# Supplementary material
Source: PubMed Central journal article supplement (PMC4076974)
Supplement: Supp_Data.pdf [file Supp_Data.pdf]

## SI Legends

**Fig. S1.** A. Inactivation of wild-type OhrR ( $\square$ ), sc OhrR WT-WT ( $\triangle$ ), or WT-C15S scOhrR ( $\times$ ) in the presence of 0.5 mM Cys. As a control, the comparatively slow inactivation of OhrR in the absence of Cys is also shown ( $\diamond$ ). B. Inactivation of OhrR ( $\square$ ), scOhrR WT-WT ( $\triangle$ ) or WT-C15S scOhrR ( $\times$ ) in the presence of 0.5 mM BSH.

**Fig. S2. S-bacillithiolated BrxB C54A does not transfer BSH to OhrR.** Immunoblot analysis using anti-BSH antibodies to follow protein S-bacillithiolation. Purified OhrR-SSB (lane 1) and BrxB C54A-SSB (lane 2) are shown as controls. BSH does not de-bacillithiolate OhrR-SSB (lane 3), but incubation with BrxB C54A leads to de-bacillithiolation and transfer of the BSH moiety to BrxB (lane 4). The reverse reaction, transfer of BSH from BrxB C54A-SSB to OhrR is not observed (lane 5).

**Table S1: Detected MetE-SSB sites by Orbitrap LC-MS/MS analysis before and after reduction by BrxA and BrxB in an in vitro Brx-assay.** His-tagged MetE was expressed and purified from *E. coli* cells, in vitro bacillithiolated using BSSB and purified as described in the Methods section. MetE-SSB was reduced by purified BrxA and BrxB for 1 hour. The MetE-SSB control reaction and MetE-SSB that was treated with BrxA and BrxB were separated by SDS-PAGE. The MetE-SSB bands and the BrxA and BrxB bands were tryptically in gel-digested. The resulting MetE-SSB peptides were analyzed using LTQ Orbitrap Velos LC-MS/MS analysis as described in the Methods section (Chi et al., 2011). The Scaffold search results are shown and the Table includes the Xcorr, deltaCn scores, m/z of the precursor ions, neutral molecular masses of the peptides, peptide mass deviations (delta ppm) of all detected bacillithiolated peptides in MetE. The CID MS/MS spectrum of the modified Cys peptides are shown, with the b and y ion series labeled in red and blue, respectively. Two replicates each for the Brx assay using MetE-SSB were performed and the averages and SEM are shown for the bacillithiolated Cys peptides of MetE before and after Brx reduction in the Table below that is used for the Figure 5.

**Table S2: Detected BrxA-SSB sites by Orbitrap LC-MS/MS analysis before and after**

**reduction of MetE-SSB by BrxA in the in vitro Brx-assay.** His-tagged MetE was expressed and purified from *E. coli* cells, in vitro bacillithiolated using BSSB and purified as described in the Methods section. MetE-SSB was reduced by purified BrxA for 1 hour. The MetE-SSB control reaction and MetE-SSB that was treated with BrxA and BrxB were separated by SDS-PAGE. The MetE-SSB bands and the BrxA and BrxB bands were tryptically in gel-digested. The resulting BrxA-SSB peptides were analyzed using LTQ Orbitrap Velos LC-MS/MS analysis as described in the Methods section (Chi et al., 2011). The Scaffold search results are shown and the Table includes the Xcorr, deltaCn scores, m/z of the precursor ions, neutral molecular masses of the peptides, peptide mass deviations (delta ppm) of all detected bacillithiolated peptides in BrxA. The CID MS/MS spectrum of the modified Cys peptides are shown, with the b and y ion series labeled in red and blue, respectively. Two replicates each for the Brx assay using MetE-SSB were performed and the averages and SEM are shown for the bacillithiolated Cys peptides of BrxA before and after Brx reduction of MetE-SSB in the Table below that is used for the Figure 5.

**Table S3: Detected BrxB-SSB sites by Orbitrap LC-MS/MS analysis before and after**

**reduction of MetE-SSB by BrxB in the in vitro Brx-assay.** His-tagged MetE was expressed and purified from *E. coli* cells, in vitro bacillithiolated using BSSB and purified as described in the Methods section. MetE-SSB was reduced by purified BrxB for 1 hour. The MetE-SSB control reaction and MetE-SSB that was treated with BrxA and BrxB were separated by SDS-PAGE. The MetE-SSB bands and the BrxA and BrxB bands were tryptically in gel-digested. The resulting BrxB-SSB peptides were analyzed using LTQ Orbitrap Velos LC-MS/MS analysis as described in the Methods section (Chi et al., 2011). The Scaffold search results are shown and the Table includes the Xcorr, deltaCn scores, m/z of the precursor ions, neutral molecular masses of the peptides, peptide mass deviations (delta ppm) of all detected bacillithiolated peptides in BrxB. The CID MS/MS spectrum of the modified Cys peptides are shown, with the b

and y ion series labeled in red and blue, respectively. Two replicates each for the Brx assay using MetE-SSB were performed and the averages and SEM are shown for the bacillithiolated Cys peptides of BrxB before and after Brx reduction of MetE-SSB in the Table below that is used for the Figure 5.

**Table S4: BrxB C54A with the Cys52-SSB site (upper figure) and BrxA C55A with Cys53-SSB site (bottom figure) *in vivo*.** FLAG-tagged BrxB C54A and BrxA C55A proteins were purified from *B. subtilis* cells after NaOCl-stress, separated by SDS-PAGE and the Brx bands tryptically digested. The resulting peptides were analyzed using LTQ Orbitrap Velos LC-MS/MS analysis as described in the Methods section (Chi et al., 2011). The Scaffold search results are shown and the Table includes the Xcorr, deltaCn scores, m/z of the precursor ions, neutral molecular masses of the peptides, peptide mass deviations (delta ppm) of the S-bacillithiolated Cys52 peptide in BrxB C54A and Cys53 in BrxA C55A. The CID MS/MS spectra are shown with the b and y ion series labeled in red and blue, respectively.

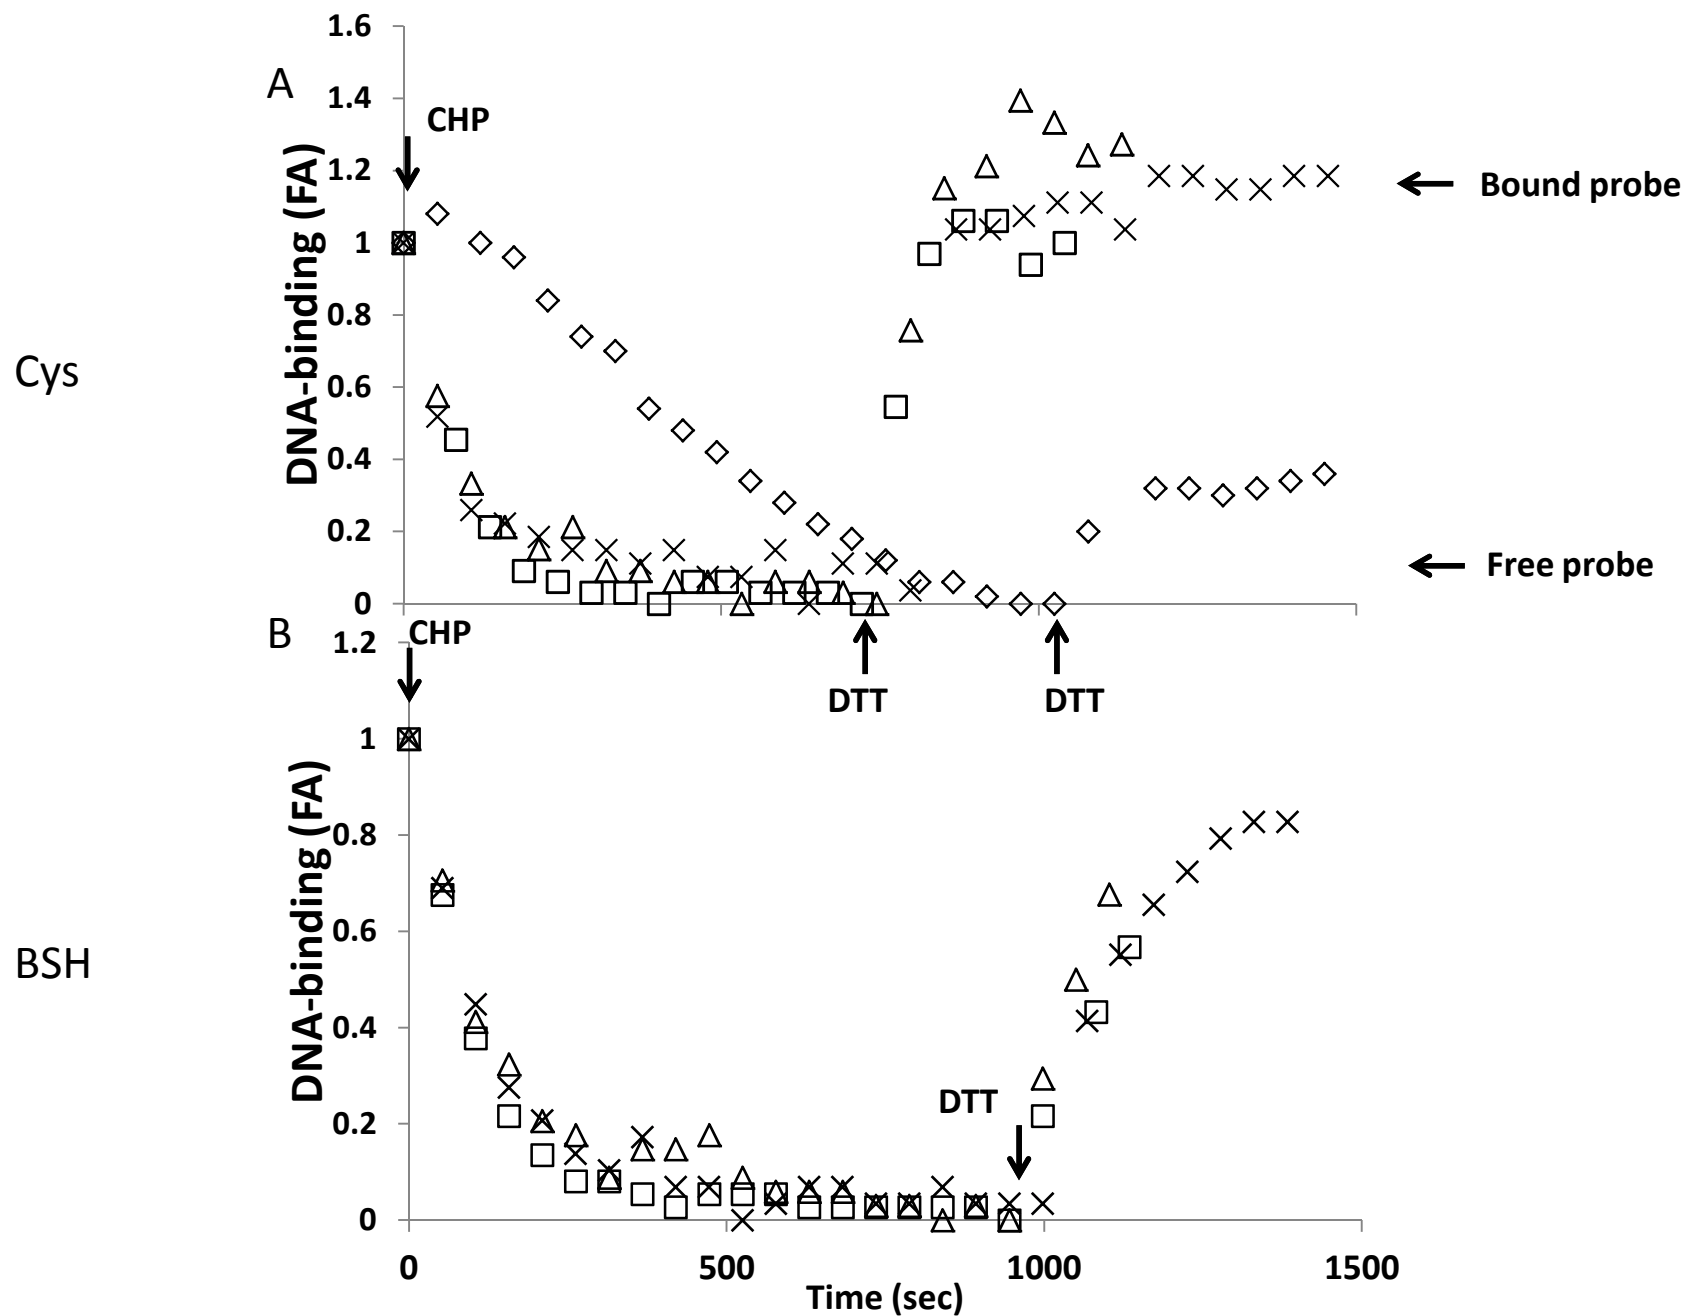

Fig. SI 1. . Inactivation of OhrR ( $\square$ ), scOhrR WT-WT ( $\triangle$ ) or WT-C15S scOhrR ( $\times$ ) in the presence of 0.5 mM L-Cys (A) or BSH (B). As a control, the comparatively slow inactivation of OhrR in the absence of thiols is also shown ( $\diamond$ ).

**Fig. S2: S-bacillithiolated BrxB C54A does not transfer BSH to OhrR.**

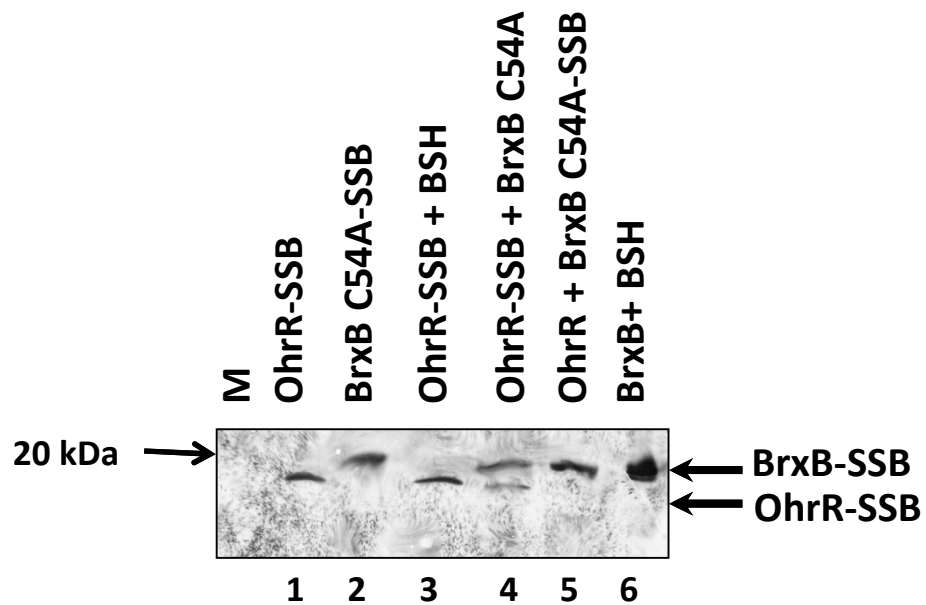

**Table S1: MetE-SSB reduction by BrxA and BrxB in vitro (SI to MetE-SSB peptide informations to Fig. 5)**

| Sequence                            | Prob | SEQUEST Xcorr | SEQUEST ΔCn | NTT | Modifications     | Observed  | Actual Mass | Charge | ΔAMU       | ΔPPM     | TIC       | Start | Stop | Spectrum ID                                       |  |
|-------------------------------------|------|---------------|-------------|-----|-------------------|-----------|-------------|--------|------------|----------|-----------|-------|------|---------------------------------------------------|--|
| <b>MetE-SSB control Replicate-1</b> |      |               |             |     |                   |           |             |        |            |          |           |       |      |                                                   |  |
| (R)VPSTEEMYNIIIDALAVcPTDR(F)        | 96%  | 5.1836        | 0.7028      | 2   | ~(+396)           | 944.7602  | 2831.2588   | 3      | 0.003419   | 1.207    | 14,591.20 | 702   | 723  | 130610_V3_P5_KB_MetE_SSB_co_2_2.12392.12392.3.dta |  |
| (R)VPSTEEMYNIIIDALAVcPTDR(F)        | 96%  | 5.0592        | 0.7896      | 2   | ~(+396)           | 944.7584  | 2831.2533   | 3      | -0.002075  | -0.7327  | 26,578.30 | 702   | 723  | 130610_V3_P5_KB_MetE_SSB_co_2_2.12343.12343.3.dta |  |
| (R)VPSTEEMYNIIIDALAVcPTDR(F)        | 96%  | 5.2177        | 0.6941      | 2   | ~(+396)           | 944.7583  | 2831.2531   | 3      | -0.002258  | -0.7974  | 27,220.40 | 702   | 723  | 130610_V3_P5_KB_MetE_SSB_co_2_2.12306.12306.3.dta |  |
| (R)VPSTEEMYNIIIDALAVcPTDR(F)        | 96%  | 4.9997        | 0.7969      | 2   | ~(+396)           | 944.7592  | 2831.2556   | 3      | 0.0003057  | 0.1079   | 13,520.70 | 702   | 723  | 130610_V3_P5_KB_MetE_SSB_co_2_2.12267.12267.3.dta |  |
| (R)VPSTEEMYNIIIDALAVcPTDR(F)        | 96%  | 4.0461        | 0.6715      | 2   | ~(+396)           | 944.7579  | 2831.2520   | 3      | -0.003356  | -1.185   | 6,669.91  | 702   | 723  | 130610_V3_P5_KB_MetE_SSB_co_2_2.11394.11394.3.dta |  |
| (R)VPSTEEMYNIIIDALAVcPTDR(F)        | 96%  | 4.5867        | 0.7053      | 2   | ~(+396)           | 944.7578  | 2831.2514   | 3      | -0.003906  | -1.379   | 7,123.97  | 702   | 723  | 130610_V3_P5_KB_MetE_SSB_co_2_2.11338.11338.3.dta |  |
| (R)VPSTEEMYNIIIDALAVcPTDR(F)        | 96%  | 3.5058        | 0.5981      | 2   | ~(+396)           | 944.7575  | 2831.2507   | 3      | -0.004638  | -1.638   | 8,693.21  | 702   | 723  | 130610_V3_P5_KB_MetE_SSB_co_2_2.11184.11184.3.dta |  |
| (R)VPSTEEMYNIIIDALAVcPTDR(F)        | 96%  | 4.3561        | 0.6894      | 2   | ~(+396)           | 944.7612  | 2831.2619   | 3      | 0.006531   | 2.306    | 11,118.70 | 702   | 723  | 130610_V3_P5_KB_MetE_SSB_co_2_2.11068.11068.3.dta |  |
| (R)VPSTEEMYNIIIDALAVcPTDR(F)        | 96%  | 4.5656        | 0.6957      | 2   | ~(+396)           | 944.7571  | 2831.2496   | 3      | -0.005737  | -2.026   | 8,588.09  | 702   | 723  | 130610_V3_P5_KB_MetE_SSB_co_2_2.11034.11034.3.dta |  |
| (R)VPSTEEMYNIIIDALAVcPTDR(F)        | 96%  | 5.0674        | 0.7613      | 2   | ~(+396)           | 944.7601  | 2831.2584   | 3      | 0.003052   | 1.077    | 11,691.60 | 702   | 723  | 130610_V3_P5_KB_MetE_SSB_co_2_2.10990.10990.3.dta |  |
| (R)VPSTEEMYNIIIDALAVcPTDR(F)        | 96%  | 5.5114        | 0.7231      | 2   | ~(+396)           | 944.7550  | 2831.2432   | 3      | -0.01215   | -4.288   | 12,948.00 | 702   | 723  | 130610_V3_P5_KB_MetE_SSB_co_2_2.10884.10884.3.dta |  |
| (R)VPSTEEMYNIIIDALAVcPTDR(F)        | 96%  | 4.9779        | 0.6684      | 2   | ~(+396)           | 944.7634  | 2831.2685   | 3      | 0.01312    | 4.633    | 13,677.00 | 702   | 723  | 130610_V3_P5_KB_MetE_SSB_co_2_2.10845.10845.3.dta |  |
| (R)VPSTEEMYNIIIDALAVcPTDR(F)        | 96%  | 4.8058        | 0.7143      | 2   | ~(+396)           | 944.7588  | 2831.2547   | 3      | -0.0006103 | -0.2155  | 12,763.80 | 702   | 723  | 130610_V3_P5_KB_MetE_SSB_co_2_2.10802.10802.3.dta |  |
| (R)VPSTEEMYNIIIDALAVcPTDR(F)        | 96%  | 5.0123        | 0.7767      | 2   | ~(+396)           | 944.7579  | 2831.2520   | 3      | -0.003356  | -1.185   | 11,207.90 | 702   | 723  | 130610_V3_P5_KB_MetE_SSB_co_2_2.10742.10742.3.dta |  |
| (R)VPSTEEMYNIIIDALAVcPTDR(F)        | 96%  | 5.0021        | 0.7254      | 2   | ~(+396)           | 944.7594  | 2831.2564   | 3      | 0.001038   | 0.3664   | 17,197.90 | 702   | 723  | 130610_V3_P5_KB_MetE_SSB_co_2_2.10660.10660.3.dta |  |
| (R)VPSTEEMYNIIIDALAVcPTDR(F)        | 96%  | 5.1924        | 0.6948      | 2   | ~(+396)           | 944.7564  | 2831.2474   | 3      | -0.007934  | -2.801   | 16,668.40 | 702   | 723  | 130610_V3_P5_KB_MetE_SSB_co_2_2.10619.10619.3.dta |  |
| (R)VPSTEEMYNIIIDALAVcPTDR(F)        | 96%  | 5.1576        | 0.7643      | 2   | ~(+396)           | 944.7605  | 2831.2597   | 3      | 0.004334   | 1.53     | 17,913.90 | 702   | 723  | 130610_V3_P5_KB_MetE_SSB_co_2_2.10576.10576.3.dta |  |
| (R)VPSTEEMYNIIIDALAVcPTDR(F)        | 96%  | 5.2905        | 0.7977      | 2   | ~(+396)           | 944.7609  | 2831.2608   | 3      | 0.005433   | 1.918    | 21,582.60 | 702   | 723  | 130610_V3_P5_KB_MetE_SSB_co_2_2.10496.10496.3.dta |  |
| (R)VPSTEEMYNIIIDALAVcPTDR(F)        | 96%  | 4.7834        | 0.6853      | 2   | ~(+396)           | 944.7557  | 2831.2452   | 3      | -0.01013   | -3.577   | 19,462.80 | 702   | 723  | 130610_V3_P5_KB_MetE_SSB_co_2_2.10456.10456.3.dta |  |
| (R)VPSTEEMYNIIIDALAVcPTDR(F)        | 96%  | 4.5139        | 0.6994      | 2   | ~(+396)           | 944.7586  | 2831.2540   | 3      | -0.001342  | -0.4739  | 16,986.40 | 702   | 723  | 130610_V3_P5_KB_MetE_SSB_co_2_2.10384.10384.3.dta |  |
| (R)VPSTEEMYNIIIDALAVcPTDR(F)        | 96%  | 4.9454        | 0.7078      | 2   | ~(+396)           | 944.7587  | 2831.2544   | 3      | -0.0009763 | -0.3447  | 28,884.20 | 702   | 723  | 130610_V3_P5_KB_MetE_SSB_co_2_2.10344.10344.3.dta |  |
| (R)VPSTEEMYNIIIDALAVcPTDR(F)        | 96%  | 4.9607        | 0.6636      | 2   | ~(+396)           | 944.7545  | 2831.2417   | 3      | -0.01361   | -4.805   | 27,961.80 | 702   | 723  | 130610_V3_P5_KB_MetE_SSB_co_2_2.10242.10242.3.dta |  |
| (R)VPSTEEMYNIIIDALAVcPTDR(F)        | 96%  | 4.9153        | 0.7267      | 2   | ~(+396)           | 944.7619  | 2831.2639   | 3      | 0.008546   | 3.017    | 31,832.80 | 702   | 723  | 130610_V3_P5_KB_MetE_SSB_co_2_2.10203.10203.3.dta |  |
| (R)VPSTEEMYNIIIDALAVcPTDR(F)        | 96%  | 5.3433        | 0.7273      | 2   | ~(+396)           | 944.7619  | 2831.2639   | 3      | 0.008546   | 3.017    | 33,131.10 | 702   | 723  | 130610_V3_P5_KB_MetE_SSB_co_2_2.10163.10163.3.dta |  |
| (R)VPSTEEMYNIIIDALAVcPTDR(F)        | 96%  | 5.0397        | 0.6821      | 2   | ~(+396)           | 944.7561  | 2831.2465   | 3      | -0.008849  | -3.124   | 40,008.80 | 702   | 723  | 130610_V3_P5_KB_MetE_SSB_co_2_2.10120.10120.3.dta |  |
| (R)VPSTEEMYNIIIDALAVcPTDR(F)        | 96%  | 5.1553        | 0.7324      | 2   | ~(+396)           | 944.7601  | 2831.2584   | 3      | 0.003052   | 1.077    | 39,504.60 | 702   | 723  | 130610_V3_P5_KB_MetE_SSB_co_2_2.10048.10048.3.dta |  |
| (R)VPSTEEMYNIIIDALAVcPTDR(F)        | 96%  | 4.9204        | 0.7729      | 2   | ~(+396)           | 944.7604  | 2831.2595   | 3      | 0.004151   | 1.466    | 50,752.70 | 702   | 723  | 130610_V3_P5_KB_MetE_SSB_co_2_2.09983.09983.3.dta |  |
| (R)VPSTEEMYNIIIDALAVcPTDR(F)        | 96%  | 5.2939        | 0.6514      | 2   | ~(+396)           | 944.7551  | 2831.2436   | 3      | -0.01178   | -4.159   | 55,685.70 | 702   | 723  | 130610_V3_P5_KB_MetE_SSB_co_2_2.09942.09942.3.dta |  |
| (R)VPSTEEMYNIIIDALAVcPTDR(F)        | 96%  | 5.2380        | 0.7827      | 2   | ~(+396)           | 944.7574  | 2831.2503   | 3      | -0.005004  | -1.767   | 77,989.70 | 702   | 723  | 130610_V3_P5_KB_MetE_SSB_co_2_2.09871.09871.3.dta |  |
| (R)VPSTEEMYNIIIDALAVcPTDR(F)        | 96%  | 5.0692        | 0.7421      | 2   | ~(+396)           | 944.7584  | 2831.2534   | 3      | -0.001891  | -0.6678  | 91,589.50 | 702   | 723  | 130610_V3_P5_KB_MetE_SSB_co_2_2.09826.09826.3.dta |  |
| (R)VPSTEEMYNIIIDALAVcPTDR(F)        | 100% | 4.0605        | 0.7869      | 2   | Ox (+16), ~(+396) | 1424.6305 | 2847.2464   | 2      | -0.003813  | -1.339   | 14,667.10 | 702   | 723  | 130610_V3_P5_KB_MetE_SSB_co_2_2.08868.08868.2.dta |  |
| (R)VPSTEEMYNIIIDALAVcPTDR(F)        | 96%  | 5.3098        | 0.7701      | 2   | Ox (+16), ~(+396) | 950.0927  | 2847.2561   | 3      | 0.005879   | 2.064    | 1.12E+07  | 702   | 723  | 130610_V3_P5_KB_MetE_SSB_co_2_2.08854.08854.3.dta |  |
| (R)VPSTEEMYNIIIDALAVcPTDR(F)        | 96%  | 5.9281        | 0.7620      | 2   | Ox (+16), ~(+396) | 950.0905  | 2847.2497   | 3      | -0.0005303 | -0.1862  | 458115    | 702   | 723  | 130610_V3_P5_KB_MetE_SSB_co_2_2.08802.08802.3.dta |  |
| (R)VPSTEEMYNIIIDALAVcPTDR(F)        | 96%  | 4.1406        | 0.6886      | 2   | ~(+396)           | 896.7585  | 2687.2538   | 3      | 0.0002747  | 0.1022   | 106475    | 520   | 539  | 130610_V3_P5_KB_MetE_SSB_co_2_2.08379.08379.3.dta |  |
| (R)VPSTEEMYNIIIDALAVcPTDR(F)        | 96%  | 5.0547        | 0.6595      | 2   | ~(+396)           | 896.7588  | 2687.2547   | 3      | 0.00119    | 0.4426   | 382327    | 520   | 539  | 130610_V3_P5_KB_MetE_SSB_co_2_2.08312.08312.3.dta |  |
| (R)VPSTEEMYNIIIDALAVcPTDR(F)        | 96%  | 3.8629        | 0.6606      | 2   | ~(+396), Ox (+16) | 902.0899  | 2703.2479   | 3      | -0.0005613 | -0.2076  | 366930    | 520   | 539  | 130610_V3_P5_KB_MetE_SSB_co_2_2.07605.07605.3.dta |  |
| (R)FVVNPDcGLK(T)                    | 98%  | 2.4407        | 0.6298      | 2   | ~(+396)           | 787.8284  | 1573.6422   | 2      | -0.0008463 | -0.5375  | 627771    | 724   | 733  | 130610_V3_P5_KB_MetE_SSB_co_2_2.06505.06505.2.dta |  |
| (R)FVVNPDcGLK(T)                    | 99%  | 2.3836        | 0.7030      | 2   | ~(+396)           | 787.8287  | 1573.6429   | 2      | -0.0001133 | -0.07196 | 1579570   | 724   | 733  | 130610_V3_P5_KB_MetE_SSB_co_2_2.06442.06442.2.dta |  |
| (R)FVVNPDcGLK(T)                    | 98%  | 2.2077        | 0.6300      | 2   | ~(+396)           | 787.8278  | 1573.6411   | 2      | -0.001944  | -1.235   | 51,795.60 | 724   | 733  | 130610_V3_P5_KB_MetE_SSB_co_2_2.06047.06047.2.dta |  |
| <b>MetE-SSB control Replicate-2</b> |      |               |             |     |                   |           |             |        |            |          |           |       |      |                                                   |  |
| (R)VPSTEEMYNIIIDALAVcPTDR(F)        | 96%  | 4.7813        | 0.7129      | 2   | ~(+396)           | 944.7587  | 2831.2544   | 3      | -0.0009763 | -0.3447  | 14,522.70 | 702   | 723  | 130610_V3_P5_KB_MetE_SSB_co_1_1.12192.12192.3.dta |  |
| (R)VPSTEEMYNIIIDALAVcPTDR(F)        | 96%  | 4.4939        | 0.7352      | 2   | ~(+396)           | 944.7592  | 2831.2558   | 3      | 0.0004887  | 0.1725   | 15,950.40 | 702   | 723  | 130610_V3_P5_KB_MetE_SSB_co_1_1.12138.12138.3.dta |  |
| (R)VPSTEEMYNIIIDALAVcPTDR(F)        | 96%  | 4.2838        | 0.7359      | 2   | ~(+396)           | 944.7582  | 2831.2527   | 3      | -0.002624  | -0.9266  | 6,764.73  | 702   | 723  | 130610_V3_P5_KB_MetE_SSB_co_1_1.12101.12101.3.dta |  |
| (R)VPSTEEMYNIIIDALAVcPTDR(F)        | 96%  | 3.3597        | 0.6547      | 2   | ~(+396)           | 944.7565  | 2831.2478   | 3      | -0.007568  | -2.672   | 7,946.10  | 702   | 723  | 130610_V3_P5_KB_MetE_SSB_co_1_1.10964.10964.3.dta |  |
| (R)VPSTEEMYNIIIDALAVcPTDR(F)        | 96%  | 4.9609        | 0.7191      | 2   | ~(+396)           | 944.7551  | 2831.2434   | 3      | -0.01196   | -4.224   | 10,002.50 | 702   | 723  | 130610_V3_P5_KB_MetE_SSB_co_1_1.10973.10973.3.dta |  |
| (R)VPSTEEMYNIIIDALAVcPTDR(F)        | 96%  | 4.6705        | 0.7493      | 2   | ~(+396)           | 944.7599  | 2831.2580   | 3      | 0.002686   | 0.9482   | 12,010.30 | 702   | 723  | 130610_V3_P5_KB_MetE_SSB_co_1_1.10641.10641.3.dta |  |
| (R)VPSTEEMYNIIIDALAVcPTDR(F)        | 96%  | 4.6133        | 0.7155      | 2   | ~(+396)           | 944.7617  | 2831.2633   | 3      | 0.007996   | 2.823    | 12,158.20 | 702   | 723  | 130610_V3_P5_KB_MetE_SSB_co_1_1.09731.09731.3.dta |  |
| (R)VPSTEEMYNIIIDALAVcPTDR(F)        | 96%  | 4.9583        | 0.6872      | 2   | ~(+396)           | 944.7581  | 2831.2525   | 3      | -0.002807  | -0.9912  | 15,069.60 | 702   | 723  | 130610_V3_P5_KB_MetE_SSB_co_1_1.10241.10241.3.dta |  |
| (R)VPSTEEMYNIIIDALAVcPTDR(F)        | 96%  | 5.4027        | 0.7612      | 2   | ~(+396)           | 944.7607  | 2831.2604   | 3      | 0.005067   | 1.789    | 34,427.50 | 702   | 723  | 130610_V3_P5_KB_MetE_SSB_co_1_1.10037.10037.3.dta |  |
| (R)VPSTEEMYNIIIDALAVcPTDR(F)        | 96%  | 4.0872        | 0.7923      | 2   | ~(+396)           | 944.7558  | 2831.2456   | 3      | -0.009765  | -3.448   | 39,167.30 | 702   | 723  | 130610_V3_P5_KB_MetE_SSB_co_1_1.09888.09888.3.dta |  |
| (R)VPSTEEMYNIIIDALAVcPTDR(F)        | 96%  | 5.4802        | 0.7841      | 2   | ~(+396)           | 944.7574  | 2831.2503   | 3      | -0.005004  | -1.767   | 50,801.60 | 702   | 723  | 130610_V3_P5_KB_MetE_SSB_co_1_1.09819.09819.3.dta |  |
| (R)VPSTEEMYNIIIDALAVcPTDR(F)        | 96%  | 5.3476        | 0.7687      | 2   | ~(+396)           | 944.7585  | 2831.2536   | 3      | -0.001708  | -0.6032  | 68,761.10 | 702   | 723  | 130610_V3_P5_KB_MetE_SSB_co_1_1.09734.09734.3.dta |  |
| (R)VPSTEEMYNIIIDALAVcPTDR(F)        | 96%  | 5.3652        | 0.7367      | 2   | ~(+396)           | 944.7605  | 2831.2597   | 3      | 0.004334   | 1.53     | 88,926.80 | 702   | 723  | 130610_V3_P5_KB_MetE_SSB_co_1_1.09692.09692.3.dta |  |
| (R)VPSTEEMYNIIIDALAVcPTDR(F)        | 96%  | 5.4537        | 0.7465      | 2   | ~(+396)           | 944.7596  | 2831.2571   | 3      | 0.001771   | 0.6252   | 141096    | 702   | 723  | 130610_V3_P5_KB_MetE_SSB_co_1_1.09589.09589.3.dta |  |
| (R)VPSTEEMYNIIIDALAVcPTDR(F)        | 96%  | 5.1091        | 0.7170      | 2   | ~(+396)           | 944.7593  | 2831.2560   | 3      | 0.0006717  | 0.2372   | 396402    | 702   | 723  | 130610_V3_P5_KB_MetE_SSB_co_1_1.09520.09520.3.dta |  |
| (R)VPSTEEMYNIIIDALAVcPTDR(F)        | 96%  | 5.2440        | 0.7625      | 2   | ~(+396)           | 944.7604  | 2831.2595   | 3      | 0.004151   | 1.466    | 3445940   | 702   | 723  | 130610_V3_P5_KB_MetE_SSB_co_1_1.09436.09436.2.dta |  |
| (R)VPSTEEMYNIIIDALAVcPTDR(F)        | 99%  | 4.6707        | 0.6470      | 2   | ~(+396)           | 1416.6361 | 2831.2577   | 2      | 0.002333   | 0.8236   | 206331    | 702   | 723  | 130610_V3_P5_KB_MetE_SSB_co_1_1.09436.09436.2.dta |  |
| (R)VPSTEEMYNIIIDALAVcPTDR(F)        | 96%  | 4.9           |             |     |                   |           |             |        |            |          |           |       |      |                                                   |  |

**Table S2: BrxA-SSB peptides after in vitro MetE-SSB reduction by BrxA (SI to BrxA-SSB peptide informations to Fig. 5)**

| Sequence                                 | Prob | SEQUEST Xcorr | SEQUEST ΔCn | NTT | Modifications      | Observed   | Actual Mass | Charge | ΔAMU       | ΔPPM      | TIC       | Start | Stop | Spectrum ID                                |  |
|------------------------------------------|------|---------------|-------------|-----|--------------------|------------|-------------|--------|------------|-----------|-----------|-------|------|--------------------------------------------|--|
| <b>BrxA Cys53-SSBpeptide Replicate-1</b> |      |               |             |     |                    |            |             |        |            |           |           |       |      |                                            |  |
| (K)AEGTLLVNSVCGAAGLAR(P)                 | 99%  | 4.3439        | 0.6705      | 2   | ~(+396), IAM (+57) | 1,222.5602 | 2,443.1058  | 2      | 0.002811   | 1.15      | 241284    | 41    | 61   | 130610_V3_P5_KB_BrxA_1_3.07377.07377.2.dta |  |
| (K)AEGTLLVNSVCGAAGLAR(P)                 | 98%  | 4.0093        | 0.6601      | 2   | ~(+396), IAM (+57) | 611.7833   | 2,443.1042  | 4      | 0.001199   | 0.4907    | 1368120   | 41    | 61   | 130610_V3_P5_KB_BrxA_1_3.07419.07419.4.dta |  |
| (K)AEGTLLVNSVCGAAGLAR(P)                 | 99%  | 4.4746        | 0.6879      | 2   | ~(+396), IAM (+57) | 1,222.5591 | 2,443.1036  | 2      | 0.0006144  | 0.2514    | 94,579.60 | 41    | 61   | 130610_V3_P5_KB_BrxA_1_3.07442.07442.2.dta |  |
| (K)AEGTLLVNSVCGAAGLAR(P)                 | 99%  | 4.6582        | 0.6814      | 2   | ~(+396), IAM (+57) | 1,222.5610 | 2,443.1075  | 2      | 0.00452    | 1.85      | 64,280.30 | 41    | 61   | 130610_V3_P5_KB_BrxA_1_3.07509.07509.2.dta |  |
| (K)AEGTLLVNSVCGAAGLAR(P)                 | 99%  | 4.5244        | 0.6873      | 2   | ~(+396), IAM (+57) | 1,222.5593 | 2,443.1041  | 2      | 0.001102   | 0.451     | 23,773.80 | 41    | 61   | 130610_V3_P5_KB_BrxA_1_3.07601.07601.2.dta |  |
| (K)AEGTLLVNSVCGAAGLAR(P)                 | 97%  | 4.6067        | 0.5882      | 2   | ~(+396), IAM (+57) | 815.3757   | 2,443.1052  | 3      | 0.002188   | 0.8954    | 969805    | 41    | 61   | 130610_V3_P5_KB_BrxA_1_3.07670.07670.3.dta |  |
| (K)AEGTLLVNSVCGAAGLAR(P)                 | 97%  | 4.3809        | 0.5930      | 2   | ~(+396), IAM (+57) | 815.3754   | 2,443.1043  | 3      | 0.001273   | 0.521     | 861204    | 41    | 61   | 130610_V3_P5_KB_BrxA_1_3.07733.07733.3.dta |  |
| (K)AEGTLLVNSVCGAAGLAR(P)                 | 97%  | 3.9883        | 0.6012      | 2   | ~(+396), IAM (+57) | 815.3742   | 2,443.1008  | 3      | -0.002206  | -0.9024   | 881644    | 41    | 61   | 130610_V3_P5_KB_BrxA_1_3.07862.07862.3.dta |  |
| (K)AEGTLLVNSVCGAAGLAR(P)                 | 97%  | 3.9292        | 0.6176      | 2   | ~(+396), IAM (+57) | 815.3759   | 2,443.1059  | 3      | 0.002921   | 1.195     | 393074    | 41    | 61   | 130610_V3_P5_KB_BrxA_1_3.08238.08238.3.dta |  |
| (K)AEGTLLVNSVCGAAGLAR(P)                 | 97%  | 5.1324        | 0.6490      | 2   | ~(+396), IAM (+57) | 815.3751   | 2,443.1034  | 3      | 0.0003574  | 0.1462    | 325125    | 41    | 61   | 130610_V3_P5_KB_BrxA_1_3.08427.08427.3.dta |  |
| (K)AEGTLLVNSVCGAAGLAR(P)                 | 97%  | 3.6976        | 0.5816      | 2   | ~(+396), IAM (+57) | 815.3749   | 2,443.1028  | 3      | -0.0001916 | -0.0784   | 276282    | 41    | 61   | 130610_V3_P5_KB_BrxA_1_3.08492.08492.3.dta |  |
| (K)AEGTLLVNSVCGAAGLAR(P)                 | 97%  | 4.1542        | 0.6129      | 2   | ~(+396), IAM (+57) | 815.3755   | 2,443.1046  | 3      | 0.001639   | 0.6708    | 290393    | 41    | 61   | 130610_V3_P5_KB_BrxA_1_3.08595.08595.3.dta |  |
| (K)AEGTLLVNSVCGAAGLAR(P)                 | 97%  | 4.1945        | 0.6068      | 2   | ~(+396), IAM (+57) | 815.3754   | 2,443.1043  | 3      | 0.001273   | 0.521     | 315465    | 41    | 61   | 130610_V3_P5_KB_BrxA_1_3.08659.08659.3.dta |  |
| (K)AEGTLLVNSVCGAAGLAR(P)                 | 97%  | 4.0174        | 0.5937      | 2   | ~(+396), IAM (+57) | 815.3751   | 2,443.1034  | 3      | 0.0003574  | 0.1462    | 366688    | 41    | 61   | 130610_V3_P5_KB_BrxA_1_3.08721.08721.3.dta |  |
| (K)AEGTLLVNSVCGAAGLAR(P)                 | 97%  | 4.0835        | 0.5977      | 2   | ~(+396), IAM (+57) | 815.3754   | 2,443.1045  | 3      | 0.001456   | 0.5959    | 495890    | 41    | 61   | 130610_V3_P5_KB_BrxA_1_3.08973.08973.3.dta |  |
| (K)AEGTLLVNSVCGAAGLAR(P)                 | 97%  | 3.7850        | 0.6616      | 2   | ~(+396), IAM (+57) | 815.3751   | 2,443.1035  | 3      | 0.0005404  | 0.2211    | 502974    | 41    | 61   | 130610_V3_P5_KB_BrxA_1_3.09099.09099.3.dta |  |
| (K)AEGTLLVNSVCGAAGLAR(P)                 | 95%  | 3.8743        | 0.4706      | 2   | ~(+396), IAM (+57) | 815.3770   | 2,443.1090  | 3      | 0.006033   | 2.469     | 548015    | 41    | 61   | 130610_V3_P5_KB_BrxA_1_3.09162.09162.3.dta |  |
| (K)AEGTLLVNSVCGAAGLAR(P)                 | 97%  | 4.0708        | 0.6076      | 2   | ~(+396), IAM (+57) | 815.3760   | 2,443.1063  | 3      | 0.003287   | 1.345     | 381624    | 41    | 61   | 130610_V3_P5_KB_BrxA_1_3.09607.09607.3.dta |  |
| (K)AEGTLLVNSVCGAAGLAR(P)                 | 97%  | 3.9460        | 0.6302      | 2   | ~(+396), IAM (+57) | 815.3755   | 2,443.1048  | 3      | 0.001822   | 0.7456    | 361430    | 41    | 61   | 130610_V3_P5_KB_BrxA_1_3.09669.09669.3.dta |  |
| (K)AEGTLLVNSVCGAAGLAR(P)                 | 97%  | 3.3289        | 0.6000      | 2   | ~(+396), IAM (+57) | 1,222.5636 | 2,443.1126  | 2      | 0.009647   | 3.947     | 11,465.60 | 41    | 61   | 130610_V3_P5_KB_BrxA_1_3.09716.09716.2.dta |  |
| (K)AEGTLLVNSVCGAAGLAR(P)                 | 97%  | 3.7169        | 0.6441      | 2   | ~(+396), IAM (+57) | 815.3760   | 2,443.1061  | 3      | 0.003104   | 1.27      | 400496    | 41    | 61   | 130610_V3_P5_KB_BrxA_1_3.09733.09733.3.dta |  |
| (K)AEGTLLVNSVCGAAGLAR(P)                 | 97%  | 4.0753        | 0.6044      | 2   | ~(+396), IAM (+57) | 815.3756   | 2,443.1050  | 3      | 0.002005   | 0.8205    | 387159    | 41    | 61   | 130610_V3_P5_KB_BrxA_1_3.09793.09793.3.dta |  |
| (K)AEGTLLVNSVCGAAGLAR(P)                 | 97%  | 4.0443        | 0.5498      | 2   | ~(+396), IAM (+57) | 815.3752   | 2,443.1037  | 3      | 0.0007234  | 0.296     | 360887    | 41    | 61   | 130610_V3_P5_KB_BrxA_1_3.09856.09856.3.dta |  |
| (K)AEGTLLVNSVCGAAGLAR(P)                 | 96%  | 3.9546        | 0.4937      | 2   | ~(+396), IAM (+57) | 815.3755   | 2,443.1046  | 3      | 0.001639   | 0.6708    | 385756    | 41    | 61   | 130610_V3_P5_KB_BrxA_1_3.10024.10024.3.dta |  |
| (K)AEGTLLVNSVCGAAGLAR(P)                 | 97%  | 3.6452        | 0.6249      | 2   | ~(+396), IAM (+57) | 815.3756   | 2,443.1050  | 3      | 0.002005   | 0.8205    | 362143    | 41    | 61   | 130610_V3_P5_KB_BrxA_1_3.10076.10076.3.dta |  |
| (K)AEGTLLVNSVCGAAGLAR(P)                 | 95%  | 3.5188        | 0.4936      | 2   | ~(+396), IAM (+57) | 815.3750   | 2,443.1032  | 3      | 0.0001744  | 0.07135   | 301162    | 41    | 61   | 130610_V3_P5_KB_BrxA_1_3.10294.10294.3.dta |  |
| (K)AEGTLLVNSVCGAAGLAR(P)                 | 96%  | 3.5350        | 0.5500      | 2   | ~(+396), IAM (+57) | 815.3753   | 2,443.1041  | 3      | 0.00109    | 0.4461    | 213113    | 41    | 61   | 130610_V3_P5_KB_BrxA_1_3.10419.10419.3.dta |  |
| (K)AEGTLLVNSVCGAAGLAR(P)                 | 98%  | 3.5287        | 0.6572      | 2   | ~(+396), IAM (+57) | 1,222.5542 | 2,443.0938  | 2      | -0.009152  | -3.744    | 6,865.67  | 41    | 61   | 130610_V3_P5_KB_BrxA_1_3.10546.10546.2.dta |  |
| (K)AEGTLLVNSVCGAAGLAR(P)                 | 97%  | 3.9731        | 0.5564      | 2   | ~(+396), IAM (+57) | 815.3749   | 2,443.1030  | 3      | -8.606E-06 | -0.003521 | 157244    | 41    | 61   | 130610_V3_P5_KB_BrxA_1_3.10636.10636.3.dta |  |
| (K)AEGTLLVNSVCGAAGLAR(P)                 | 97%  | 3.6843        | 0.6101      | 2   | ~(+396), IAM (+57) | 815.3755   | 2,443.1043  | 3      | 0.001822   | 0.7456    | 140262    | 41    | 61   | 130610_V3_P5_KB_BrxA_1_3.10720.10720.2.dta |  |
| (K)AEGTLLVNSVCGAAGLAR(P)                 | 96%  | 3.8956        | 0.5092      | 2   | ~(+396), IAM (+57) | 815.3748   | 2,443.1024  | 3      | -0.0005576 | -0.2281   | 107074    | 41    | 61   | 130610_V3_P5_KB_BrxA_1_3.10877.10877.3.dta |  |
| (K)AEGTLLVNSVCGAAGLAR(P)                 | 97%  | 3.5205        | 0.6364      | 2   | ~(+396), IAM (+57) | 815.3748   | 2,443.1024  | 3      | -0.0005576 | -0.2281   | 84,877.60 | 41    | 61   | 130610_V3_P5_KB_BrxA_1_3.10993.10993.3.dta |  |
| (K)AEGTLLVNSVCGAAGLAR(P)                 | 97%  | 4.0513        | 0.6006      | 2   | ~(+396), IAM (+57) | 815.3751   | 2,443.1034  | 3      | 0.0003574  | 0.1462    | 83,911.10 | 41    | 61   | 130610_V3_P5_KB_BrxA_1_3.11029.11029.3.dta |  |
| (K)AEGTLLVNSVCGAAGLAR(P)                 | 97%  | 4.0520        | 0.6034      | 2   | ~(+396), IAM (+57) | 815.3749   | 2,443.1028  | 3      | -0.0001916 | -0.0784   | 67,207.40 | 41    | 61   | 130610_V3_P5_KB_BrxA_1_3.11148.11148.3.dta |  |
| (K)AEGTLLVNSVCGAAGLAR(P)                 | 97%  | 3.8423        | 0.5685      | 2   | ~(+396), IAM (+57) | 815.3752   | 2,443.1039  | 3      | 0.0009064  | 0.3708    | 66,001.70 | 41    | 61   | 130610_V3_P5_KB_BrxA_1_3.11190.11190.3.dta |  |
| (K)AEGTLLVNSVCGAAGLAR(P)                 | 96%  | 4.0039        | 0.5066      | 2   | ~(+396), IAM (+57) | 815.3751   | 2,443.1034  | 3      | 0.0003574  | 0.1462    | 39,954.80 | 41    | 61   | 130610_V3_P5_KB_BrxA_1_3.11383.11383.3.dta |  |
| (K)AEGTLLVNSVCGAAGLAR(P)                 | 97%  | 3.8891        | 0.6026      | 2   | ~(+396), IAM (+57) | 815.3752   | 2,443.1037  | 3      | 0.0007234  | 0.296     | 46,409.80 | 41    | 61   | 130610_V3_P5_KB_BrxA_1_3.11467.11467.3.dta |  |
| (K)AEGTLLVNSVCGAAGLAR(P)                 | 97%  | 4.3444        | 0.5927      | 2   | ~(+396), IAM (+57) | 815.3750   | 2,443.1032  | 3      | 0.0001744  | 0.07135   | 39,217.70 | 41    | 61   | 130610_V3_P5_KB_BrxA_1_3.11575.11575.3.dta |  |
| (K)AEGTLLVNSVCGAAGLAR(P)                 | 97%  | 3.8041        | 0.6216      | 2   | ~(+396), IAM (+57) | 815.3748   | 2,443.1026  | 3      | -0.0003746 | -0.1533   | 34,236.80 | 41    | 61   | 130610_V3_P5_KB_BrxA_1_3.11619.11619.3.dta |  |
| (K)AEGTLLVNSVCGAAGLAR(P)                 | 97%  | 3.7241        | 0.6553      | 2   | ~(+396), IAM (+57) | 815.3753   | 2,443.1041  | 3      | 0.00109    | 0.4461    | 25,763.10 | 41    | 61   | 130610_V3_P5_KB_BrxA_1_3.11654.11654.3.dta |  |
| (K)AEGTLLVNSVCGAAGLAR(P)                 | 97%  | 3.9120        | 0.6346      | 2   | ~(+396), IAM (+57) | 815.3747   | 2,443.1023  | 3      | -0.0007416 | -0.3034   | 24,972.80 | 41    | 61   | 130610_V3_P5_KB_BrxA_1_3.11759.11759.3.dta |  |
| (K)AEGTLLVNSVCGAAGLAR(P)                 | 97%  | 4.2106        | 0.6055      | 2   | ~(+396), IAM (+57) | 815.3754   | 2,443.1043  | 3      | 0.001273   | 0.521     | 21,838.30 | 41    | 61   | 130610_V3_P5_KB_BrxA_1_3.11829.11829.3.dta |  |
| (K)AEGTLLVNSVCGAAGLAR(P)                 | 97%  | 4.1453        | 0.6061      | 2   | ~(+396), IAM (+57) | 815.3754   | 2,443.1043  | 3      | 0.001273   | 0.521     | 18,615.70 | 41    | 61   | 130610_V3_P5_KB_BrxA_1_3.11891.11891.3.dta |  |
| (K)AEGTLLVNSVCGAAGLAR(P)                 | 97%  | 4.1762        | 0.6342      | 2   | ~(+396), IAM (+57) | 815.3755   | 2,443.1046  | 3      | 0.001639   | 0.6708    | 100723    | 41    | 61   | 130610_V3_P5_KB_BrxA_1_3.12570.12570.3.dta |  |
| (K)AEGTLLVNSVCGAAGLAR(P)                 | 96%  | 3.9277        | 0.5359      | 2   | ~(+396), IAM (+57) | 815.3749   | 2,443.1028  | 3      | -0.0001916 | -0.0784   | 131345    | 41    | 61   | 130610_V3_P5_KB_BrxA_1_3.12627.12627.3.dta |  |
| (K)AEGTLLVNSVCGAAGLAR(P)                 | 96%  | 3.3097        | 0.5720      | 2   | ~(+396), IAM (+57) | 815.3749   | 2,443.1028  | 3      | -0.0001916 | -0.0784   | 83,757.60 | 41    | 61   | 130610_V3_P5_KB_BrxA_1_3.12679.12679.3.dta |  |
| <b>BrxA Cys53-SSBpeptide Replicate-2</b> |      |               |             |     |                    |            |             |        |            |           |           |       |      |                                            |  |
| (K)AEGTLLVNSVCGAAGLAR(P)                 | 97%  | 3.8498        | 0.5580      | 2   | ~(+396), IAM (+57) | 815.3748   | 2,443.1024  | 3      | -0.0005576 | -0.2281   | 859066    | 41    | 61   | 130610_V3_P5_KB_BrxA_2_4.07657.07657.3.dta |  |
| (K)AEGTLLVNSVCGAAGLAR(P)                 | 99%  | 4.2945        | 0.6787      | 2   | ~(+396), IAM (+57) | 1,222.5602 | 2,443.1058  | 2      | 0.002811   | 1.15      | 180191    | 41    | 61   | 130610_V3_P5_KB_BrxA_2_4.07681.07681.2.dta |  |
| (K)AEGTLLVNSVCGAAGLAR(P)                 | 96%  | 3.9780        | 0.5462      | 2   | ~(+396), IAM (+57) | 815.3777   | 2,443.1112  | 3      | 0.008231   | 3.368     | 3,08E+07  | 41    | 61   | 130610_V3_P5_KB_BrxA_2_4.07720.07720.2.dta |  |
| (K)AEGTLLVNSVCGAAGLAR(P)                 | 99%  | 4.6019        | 0.6776      | 2   | ~(+396), IAM (+57) | 1,222.5599 | 2,443.1053  | 2      | 0.002323   | 0.9506    | 340056    | 41    | 61   | 130610_V3_P5_KB_BrxA_2_4.07741.07741.2.dta |  |
| (K)AEGTLLVNSVCGAAGLAR(P)                 | 96%  | 3.8530        | 0.5517      | 2   | ~(+396), IAM (+57) | 815.3766   | 2,443.1079  | 3      | 0.004935   | 2.019     | 8700520   | 41    | 61   | 130610_V3_P5_KB_BrxA_2_4.07783.07783.3.dta |  |
| (K)AEGTLLVNSVCGAAGLAR(P)                 | 98%  | 4.2054        | 0.5820      | 2   | ~(+396), IAM (+57) | 611.7833   | 2,443.1040  | 4      | 0.0009554  | 0.3909    | 492841    | 41    | 61   | 130610_V3_P5_KB_BrxA_2_4.07786.07786.4.dta |  |
| (K)AEGTLLVNSVCGAAGLAR(P)                 | 99%  | 4.3958        | 0.7172      | 2   | ~(+396), IAM (+57) | 1,222.5598 | 2,443.1051  | 2      | 0.002079   | 0.8508    | 90,325.70 | 41    | 61   | 130610_V3_P5_KB_BrxA_2_4.07808.07808.2.dta |  |
| (K)AEGTLLVNSVCGAAGLAR(P)                 | 97%  | 3.7661        | 0.6333      | 2   | ~(+396), IAM (+57) | 815.3767   | 2,443.1083  | 3      | 0.003001   | 1.269     | 5454350   | 41    | 61   | 130610_V3_P5_KB_BrxA_2_4.07846.07846.3.dta |  |
| (K)AEGTLLVNSVCGAAGLAR(P)                 | 98%  | 4.1478        | 0.6044      | 2   | ~(+396), IAM (+57) | 1,222.5603 | 2,443.1061  | 2      | 0.003055   | 1.25      | 65,303.30 | 41    | 61   | 130610_V3_P5_KB_BrxA_2_4.07874.07874.2.dta |  |
| (K)AEGTLLVNSVCGAAGLAR(P)                 | 99%  | 4.7299        | 0.7332      | 2   | ~(+396), IAM (+57) | 1,222.5588 | 2,443.1031  | 2      | 0.0001264  | 0.05171   | 47,159.80 |       |      |                                            |  |

**Table S3: BrxB-SSB peptides after in vitro MetE-SSB reduction by BrxB (SI to BrxB-SSB peptide informations to Fig. 5)**

| Sequence                        | Prob | SEQUEST XCorr | SEQUEST ΔCn | NTT | Modifications       | Observed  | Actual Mass | Charge | ΔAMU       | ΔPPM     | TIC       | Start | Stop | Spectrum ID                                |  |
|---------------------------------|------|---------------|-------------|-----|---------------------|-----------|-------------|--------|------------|----------|-----------|-------|------|--------------------------------------------|--|
| <b>BrxB Cys52-SSB peptide 1</b> |      |               |             |     |                     |           |             |        |            |          |           |       |      |                                            |  |
| (K)LQEAFFEYCEEV(-)              | 99%  | 3.5339        | 0.9781      | 2   | ~ (+396)            | 942.8559  | 1883.6972   | 2      | 0.0007077  | 0.3755   | 58,186.30 | 134   | 145  | 130610_V3_P5_KB_BrxB_1_5.06591.06591.2.dta |  |
| (K)LQEAFFEYCEEV(-)              | 99%  | 3.1124        | 0.9156      | 2   | ~ (+396)            | 942.8558  | 1883.6971   | 2      | 0.0005857  | 0.3108   | 92,802.40 | 134   | 145  | 130610_V3_P5_KB_BrxB_1_5.06631.06631.2.dta |  |
| (K)LQEAFFEYCEEV(-)              | 99%  | 3.0009        | 0.8836      | 2   | ~ (+396)            | 942.8558  | 1883.6970   | 2      | 0.0004637  | 0.246    | 45,494.70 | 134   | 145  | 130610_V3_P5_KB_BrxB_1_5.06677.06677.2.dta |  |
| (K)LQEAFFEYCEEV(-)              | 99%  | 2.4764        | 0.8904      | 2   | ~ (+396)            | 942.8553  | 1883.6960   | 2      | -0.0005133 | -0.2724  | 21,657.90 | 134   | 145  | 130610_V3_P5_KB_BrxB_1_5.06856.06856.2.dta |  |
| (K)LQEAFFEYCEEV(-)              | 98%  | 2.5758        | 0.7802      | 2   | ~ (+396)            | 942.8548  | 1883.6950   | 2      | -0.001489  | -0.7902  | 25,277.80 | 134   | 145  | 130610_V3_P5_KB_BrxB_1_5.06948.06948.2.dta |  |
| (K)LQEAFFEYCEEV(-)              | 99%  | 2.3117        | 0.891       | 2   | ~ (+396)            | 942.8550  | 1883.6955   | 2      | -0.001001  | -0.5313  | 12,915.20 | 134   | 145  | 130610_V3_P5_KB_BrxB_1_5.07008.07008.2.dta |  |
| (K)LQEAFFEYCEEV(-)              | 99%  | 2.2767        | 0.9869      | 2   | ~ (+396)            | 942.8538  | 1883.6931   | 2      | -0.003442  | -1.826   | 11,019.00 | 134   | 145  | 130610_V3_P5_KB_BrxB_1_5.07095.07095.2.dta |  |
| (K)GTTLMVNSVcGcAGGIAR(P)        | 96%  | 3.6678        | 0.5241      | 2   | ~ (+396), IAM (+57) | 797.3649  | 2389.0728   | 3      | -0.002022  | -0.8458  | 119590    | 41    | 60   | 130610_V3_P5_KB_BrxB_1_5.04815.04815.3.dta |  |
| (K)GTTLMVNSVcGcAGGIAR(P)        | 99%  | 4.5683        | 0.7697      | 2   | ~ (+396), IAM (+57) | 1195.5454 | 2389.0763   | 2      | 0.00147    | 0.6152   | 38,826.60 | 41    | 60   | 130610_V3_P5_KB_BrxB_1_5.04841.04841.2.dta |  |
| (K)GTTLMVNSVcGcAGGIAR(P)        | 96%  | 3.5027        | 0.5008      | 2   | ~ (+396), IAM (+57) | 797.3651  | 2389.0733   | 3      | -0.001472  | -0.6157  | 136079    | 41    | 60   | 130610_V3_P5_KB_BrxB_1_5.04901.04901.3.dta |  |
| (K)GTTLMVNSVcGcAGGIAR(P)        | 97%  | 3.7127        | 0.6231      | 2   | ~ (+396), IAM (+57) | 797.3657  | 2389.0753   | 3      | 0.0005424  | 0.2269   | 61,904.50 | 41    | 60   | 130610_V3_P5_KB_BrxB_1_5.04943.04943.3.dta |  |
| (K)GTTLMVNSVcGcAGGIAR(P)        | 99%  | 4.3844        | 0.7465      | 2   | ~ (+396), IAM (+57) | 1131.4972 | 2260.9798   | 2      | 0.0003539  | 0.01565  | 102764    | 42    | 60   | 130610_V3_P5_KB_BrxB_1_5.05626.05626.2.dta |  |
| (K)GTTLMVNSVcGcAGGIAR(P)        | 99%  | 4.2349        | 0.7763      | 2   | ~ (+396), IAM (+57) | 1131.4971 | 2260.9796   | 2      | -0.0002086 | -0.09222 | 78,814.20 | 42    | 60   | 130610_V3_P5_KB_BrxB_1_5.05668.05668.2.dta |  |
| (K)GTTLMVNSVcGcAGGIAR(P)        | 97%  | 3.5031        | 0.6333      | 2   | ~ (+396), IAM (+57) | 754.6664  | 2260.9773   | 3      | -0.00248   | -1.096   | 395205    | 42    | 60   | 130610_V3_P5_KB_BrxB_1_5.05778.05778.3.dta |  |
| (K)GTTLMVNSVcGcAGGIAR(P)        | 97%  | 3.791         | 0.7099      | 2   | ~ (+396), IAM (+57) | 754.6670  | 2260.9791   | 3      | -0.0006486 | -0.2867  | 239572    | 42    | 60   | 130610_V3_P5_KB_BrxB_1_5.05862.05862.3.dta |  |
| (K)GTTLMVNSVcGcAGGIAR(P)        | 97%  | 3.5648        | 0.6629      | 2   | ~ (+396), IAM (+57) | 754.6666  | 2260.9780   | 3      | -0.001748  | -0.7726  | 160028    | 42    | 60   | 130610_V3_P5_KB_BrxB_1_5.05927.05927.3.dta |  |
| (K)GTTLMVNSVcGcAGGIAR(P)        | 97%  | 4.0554        | 0.7564      | 2   | ~ (+396), IAM (+57) | 754.6671  | 2260.9793   | 3      | -0.0004656 | -0.2058  | 88,924.90 | 42    | 60   | 130610_V3_P5_KB_BrxB_1_5.06031.06031.3.dta |  |
| (K)GTTLMVNSVcGcAGGIAR(P)        | 97%  | 3.689         | 0.7073      | 2   | ~ (+396), IAM (+57) | 754.6668  | 2260.9786   | 3      | -0.001199  | -0.5299  | 48,751.50 | 42    | 60   | 130610_V3_P5_KB_BrxB_1_5.06685.06685.3.dta |  |
| (K)GTTLMVNSVcGcAGGIAR(P)        | 97%  | 3.6412        | 0.6866      | 2   | ~ (+396), IAM (+57) | 754.6669  | 2260.9788   | 3      | -0.001016  | -0.449   | 40,367.40 | 42    | 60   | 130610_V3_P5_KB_BrxB_1_5.06728.06728.3.dta |  |
| (K)GTTLMVNSVcGcAGGIAR(P)        | 97%  | 3.3639        | 0.6342      | 2   | ~ (+396), IAM (+57) | 754.6679  | 2260.9819   | 3      | 0.002097   | 0.9272   | 41,799.80 | 42    | 60   | 130610_V3_P5_KB_BrxB_1_5.07075.07075.3.dta |  |
| (K)GTTLMVNSVcGcAGGIAR(P)        | 97%  | 3.4168        | 0.7204      | 2   | ~ (+396), IAM (+57) | 754.6673  | 2260.9801   | 3      | 0.0002664  | 0.1178   | 32,758.50 | 42    | 60   | 130610_V3_P5_KB_BrxB_1_5.07369.07369.3.dta |  |
| (K)GTTLMVNSVcGcAGGIAR(P)        | 97%  | 3.3314        | 0.6307      | 2   | ~ (+396), IAM (+57) | 754.6674  | 2260.9804   | 3      | 0.0006324  | 0.2796   | 43,543.50 | 42    | 60   | 130610_V3_P5_KB_BrxB_1_5.07833.07833.3.dta |  |
| (K)GTTLMVNSVcGcAGGIAR(P)        | 97%  | 3.3249        | 0.7019      | 2   | ~ (+396), IAM (+57) | 754.6675  | 2260.9806   | 3      | 0.0008154  | 0.3605   | 65,119.20 | 42    | 60   | 130610_V3_P5_KB_BrxB_1_5.08162.08162.3.dta |  |
| (K)GTTLMVNSVcGcAGGIAR(P)        | 97%  | 3.5985        | 0.7397      | 2   | ~ (+396), IAM (+57) | 754.6671  | 2260.9793   | 3      | -0.0004656 | -0.2058  | 65,215.30 | 42    | 60   | 130610_V3_P5_KB_BrxB_1_5.08346.08346.3.dta |  |
| (K)GTTLMVNSVcGcAGGIAR(P)        | 97%  | 3.5049        | 0.6345      | 2   | ~ (+396), IAM (+57) | 754.6677  | 2260.9813   | 3      | 0.001548   | 0.6845   | 56,668.40 | 42    | 60   | 130610_V3_P5_KB_BrxB_1_5.08389.08389.3.dta |  |
| (K)GTTLMVNSVcGcAGGIAR(P)        | 97%  | 3.4963        | 0.6768      | 2   | ~ (+396), IAM (+57) | 754.6671  | 2260.9795   | 3      | -0.0002826 | -0.1249  | 37,543.00 | 42    | 60   | 130610_V3_P5_KB_BrxB_1_5.08430.08430.3.dta |  |
| (K)GTTLMVNSVcGcAGGIAR(P)        | 97%  | 3.3583        | 0.6423      | 2   | ~ (+396), IAM (+57) | 754.6667  | 2260.9784   | 3      | -0.001382  | -0.6108  | 52,593.10 | 42    | 60   | 130610_V3_P5_KB_BrxB_1_5.08514.08514.3.dta |  |
| <b>BrxB Cys52-SSB peptide 2</b> |      |               |             |     |                     |           |             |        |            |          |           |       |      |                                            |  |
| (K)LQEAFFEYCEEV(-)              | 99%  | 3.4316        | 0.8598      | 2   | ~ (+396)            | 942.8557  | 1883.6969   | 2      | 0.0003417  | 0.1813   | 51,842.80 | 134   | 145  | 130610_V3_P5_KB_BrxB_2_6.06715.06715.2.dta |  |
| (K)LQEAFFEYCEEV(-)              | 99%  | 3.0351        | 0.962       | 2   | ~ (+396)            | 942.8558  | 1883.6971   | 2      | 0.0005857  | 0.3108   | 144311    | 134   | 145  | 130610_V3_P5_KB_BrxB_2_6.06752.06752.2.dta |  |
| (K)LQEAFFEYCEEV(-)              | 99%  | 3.2967        | 0.8768      | 2   | ~ (+396)            | 942.8557  | 1883.6969   | 2      | 0.0003417  | 0.1813   | 63,913.80 | 134   | 145  | 130610_V3_P5_KB_BrxB_2_6.06794.06794.2.dta |  |
| (K)LQEAFFEYCEEV(-)              | 98%  | 2.2245        | 0.7763      | 2   | ~ (+396)            | 942.8560  | 1883.6974   | 2      | 0.0008297  | 0.4402   | 120520    | 134   | 145  | 130610_V3_P5_KB_BrxB_2_6.06863.06863.2.dta |  |
| (K)LQEAFFEYCEEV(-)              | 99%  | 2.8494        | 0.9073      | 2   | ~ (+396)            | 942.8559  | 1883.6972   | 2      | 0.0007077  | 0.3755   | 25,277.10 | 134   | 145  | 130610_V3_P5_KB_BrxB_2_6.06972.06972.2.dta |  |
| (K)LQEAFFEYCEEV(-)              | 99%  | 2.8524        | 0.9192      | 2   | ~ (+396)            | 942.8552  | 1883.6959   | 2      | -0.0006353 | -0.3371  | 14,645.00 | 134   | 145  | 130610_V3_P5_KB_BrxB_2_6.07082.07082.2.dta |  |
| (K)LQEAFFEYCEEV(-)              | 99%  | 2.9067        | 0.8804      | 2   | ~ (+396)            | 942.8560  | 1883.6975   | 2      | 0.0009517  | 0.505    | 12,190.50 | 134   | 145  | 130610_V3_P5_KB_BrxB_2_6.07141.07141.2.dta |  |
| (K)LQEAFFEYCEEV(-)              | 99%  | 2.8557        | 0.9298      | 2   | ~ (+396)            | 942.8547  | 1883.6948   | 2      | -0.001733  | -0.9197  | 18,188.30 | 134   | 145  | 130610_V3_P5_KB_BrxB_2_6.07226.07226.2.dta |  |
| (K)LQEAFFEYCEEV(-)              | 99%  | 3.188         | 0.8686      | 2   | ~ (+396)            | 942.8575  | 1883.7004   | 2      | 0.003882   | 2.06     | 14,020.40 | 134   | 145  | 130610_V3_P5_KB_BrxB_2_6.07303.07303.2.dta |  |
| (K)LQEAFFEYCEEV(-)              | 99%  | 2.9151        | 0.8249      | 2   | ~ (+396)            | 942.8548  | 1883.6950   | 2      | -0.001489  | -0.7902  | 7,671.48  | 134   | 145  | 130610_V3_P5_KB_BrxB_2_6.07350.07350.2.dta |  |
| (K)LQEAFFEYCEEV(-)              | 99%  | 2.989         | 0.9129      | 2   | ~ (+396)            | 942.8562  | 1883.6978   | 2      | 0.001318   | 0.6992   | 10,647.40 | 134   | 145  | 130610_V3_P5_KB_BrxB_2_6.07402.07402.2.dta |  |
| (K)LQEAFFEYCEEV(-)              | 99%  | 2.832         | 0.823       | 2   | ~ (+396)            | 942.8558  | 1883.6971   | 2      | 0.0005857  | 0.3108   | 7,076.55  | 134   | 145  | 130610_V3_P5_KB_BrxB_2_6.07454.07454.2.dta |  |
| (K)LQEAFFEYCEEV(-)              | 99%  | 2.6617        | 0.8108      | 2   | ~ (+396)            | 942.8552  | 1883.6959   | 2      | -0.0006353 | -0.3371  | 6,359.12  | 134   | 145  | 130610_V3_P5_KB_BrxB_2_6.07500.07500.2.dta |  |
| (K)GTTLMVNSVcGcAGGIAR(P)        | 98%  | 3.9843        | 0.6625      | 2   | ~ (+396), IAM (+57) | 598.2766  | 2389.0773   | 4      | 0.002543   | 1.064    | 2224600   | 41    | 60   | 130610_V3_P5_KB_BrxB_2_6.04941.04941.4.dta |  |
| (K)GTTLMVNSVcGcAGGIAR(P)        | 99%  | 4.6822        | 0.8098      | 2   | ~ (+396), IAM (+57) | 1195.5458 | 2389.0770   | 2      | 0.002203   | 0.9219   | 47,361.20 | 41    | 60   | 130610_V3_P5_KB_BrxB_2_6.04964.04964.2.dta |  |
| (K)GTTLMVNSVcGcAGGIAR(P)        | 96%  | 3.3174        | 0.5204      | 2   | ~ (+396), IAM (+57) | 797.3648  | 2389.0726   | 3      | -0.002205  | -0.9224  | 76,825.80 | 41    | 60   | 130610_V3_P5_KB_BrxB_2_6.05078.05078.3.dta |  |
| (K)GTTLMVNSVcGcAGGIAR(P)        | 97%  | 3.5093        | 0.6215      | 2   | ~ (+396), IAM (+57) | 797.3642  | 2389.0708   | 3      | -0.004036  | -1.688   | 47,138.70 | 41    | 60   | 130610_V3_P5_KB_BrxB_2_6.05120.05120.3.dta |  |
| (K)GTTLMVNSVcGcAGGIAR(P)        | 97%  | 3.7865        | 0.6226      | 2   | ~ (+396), IAM (+57) | 797.3660  | 2389.0761   | 3      | 0.001274   | 0.5332   | 33,142.80 | 41    | 60   | 130610_V3_P5_KB_BrxB_2_6.05200.05200.3.dta |  |
| (K)GTTLMVNSVcGcAGGIAR(P)        | 97%  | 3.3969        | 0.6286      | 2   | ~ (+396), IAM (+57) | 797.3649  | 2389.0730   | 3      | -0.001838  | -0.7688  | 16,898.90 | 41    | 60   | 130610_V3_P5_KB_BrxB_2_6.05460.05460.3.dta |  |
| (K)GTTLMVNSVcGcAGGIAR(P)        | 97%  | 4.0277        | 0.7292      | 2   | ~ (+396), IAM (+57) | 754.6681  | 2260.9824   | 3      | 0.002646   | 1.17     | 2797070   | 42    | 60   | 130610_V3_P5_KB_BrxB_2_6.05715.05715.3.dta |  |
| (K)GTTLMVNSVcGcAGGIAR(P)        | 99%  | 4.4324        | 0.7794      | 2   | ~ (+396), IAM (+57) | 1131.4974 | 2260.9803   | 2      | 0.0005234  | 0.2314   | 83,898.10 | 42    | 60   | 130610_V3_P5_KB_BrxB_2_6.05718.05718.2.dta |  |
| (K)GTTLMVNSVcGcAGGIAR(P)        | 99%  | 3.7098        | 0.7638      | 2   | ~ (+396), IAM (+57) | 1131.4971 | 2260.9796   | 2      | -0.0002086 | -0.09222 | 173347    | 42    | 60   | 130610_V3_P5_KB_BrxB_2_6.05760.05760.2.dta |  |
| (K)GTTLMVNSVcGcAGGIAR(P)        | 99%  | 4.0596        | 0.7845      | 2   | ~ (+396), IAM (+57) | 1131.4886 | 2260.9627   | 2      | -0.01705   | -7.54    | 13,353.30 | 42    | 60   | 130610_V3_P5_KB_BrxB_2_6.05878.05878.2.dta |  |
| (K)GTTLMVNSVcGcAGGIAR(P)        | 97%  | 3.6488        | 0.6807      | 2   | ~ (+396), IAM (+57) | 754.6663  | 2260.9771   | 3      | -0.002664  | -1.178   | 407211    | 42    | 60   | 130610_V3_P5_KB_BrxB_2_6.05883.05883.3.dta |  |
| (K)GTTLMVNSVcGcAGGIAR(P)        | 99%  | 3.7252        | 0.8301      | 2   | ~ (+396), IAM (+57) | 1131.4969 | 2260.9793   | 2      | -0.0004536 | -0.2005  | 6,833.28  | 42    | 60   | 130610_V3_P5_KB_BrxB_2_6.05975.05975.2.dta |  |
| (K)GTTLMVNSVcGcAGGIAR(P)        | 97%  | 3.4147        | 0.7383      | 2   | ~ (+396), IAM (+57) | 754.6671  | 2260.9795   | 3      | -0.0002826 | -0.1249  | 120646    | 42    | 60   | 130610_V3_P5_KB_BrxB_2_6.06090.06090.3.dta |  |
| (K)GTTLMVNSVcGcAGGIAR(P)        | 97%  | 3.3109        | 0.6487      | 2   | ~ (+396), IAM (+57) | 754.6672  | 2260.9797   | 3      | -0.0009961 | -0.04403 | 62,467.40 | 42    | 60   | 130610_V3_P5_KB_BrxB_2_6.06928.06928.3.dta |  |
| (K)GTTLMVNSVcGcAGGIAR(P)        | 97%  | 3.7898        | 0.7048      | 2   | ~ (+396), IAM (+57) | 754.6675  | 2260.9808   | 3      | 0.0009984  | 0.4414   | 41,627.80 | 42    | 60   | 130610_V3_P5_KB_BrxB_2_6.06973.06973.3.dta |  |
| (K)GTTLMVNSVcGcAGGIAR(P)        | 97%  | 3.8421        | 0.6949      | 2   | ~ (+396), IAM (+57) | 754.6673  | 2260.9801   | 3      | 0.0002664  | 0.1178   | 30,575.40 | 42    | 60   | 130610_V3_P5_KB_BrxB_2_6.07483.07483.3.dta |  |
| (K)GTTLMVNSVcGcAGGIAR(P)        | 97%  | 3.3052        | 0.7186      | 2   | ~ (+396), IAM (+57) | 754.6671  | 2260.9      |        |            |          |           |       |      |                                            |  |



**Table S4: Identification of Cys52-SSB in BrxB C54A and Cys53-SSB in BrxA C55A in vivo after immunoprecipitation**

**BrxB-Cys52-SSB**

| Sequence                   | Prob | SEQUEST XCorr | SEQUEST ΔCn | NTT | Modifications      | Observed | Actual Mass | Charge | ΔAMU     | ΔPPM    | TIC       | Start | Stop | Spectrum ID                                       |  |  |  |
|----------------------------|------|---------------|-------------|-----|--------------------|----------|-------------|--------|----------|---------|-----------|-------|------|---------------------------------------------------|--|--|--|
| (K)GTTTLVmvNSVcGAAGGIAR(P) | 95%  | 3.0551        | 0.729       | 1   | Ox (+16), ^ (+396) | 730.3342 | 2187.9807   | 3      | 0.000076 | 0.03472 | 19,661.90 | 42    | 60   | 110328_OV3_P3_KG_HA_YqiWC54A_10.09955.09955.3.dta |  |  |  |

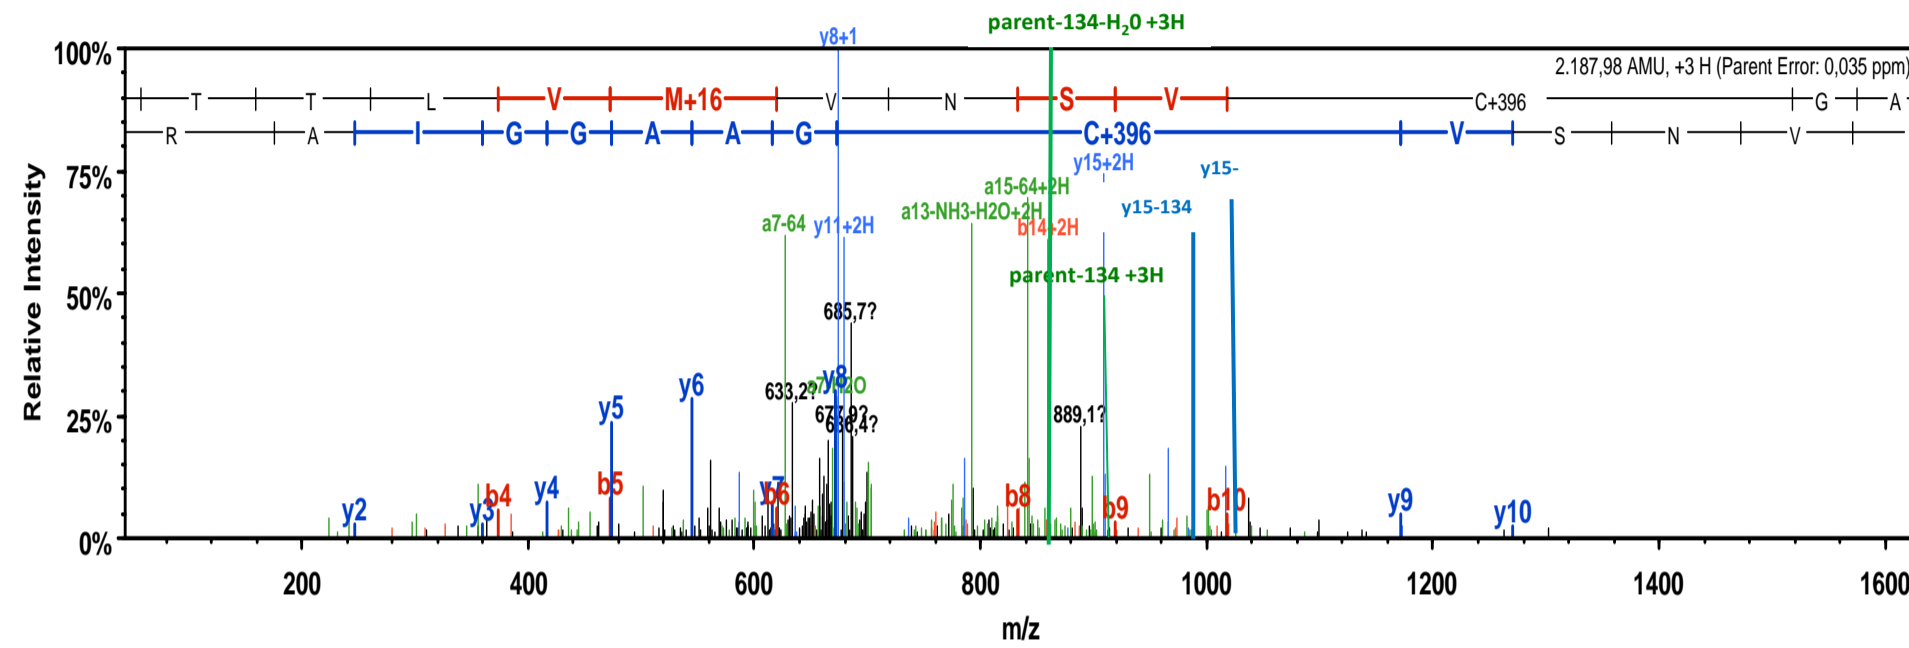

| B  | B Ions  | B+2H    | B-NH3   | B-H2O   | AA    | Y Ions  | Y+2H    | Y-NH3   | Y-H2O   | Y  |
|----|---------|---------|---------|---------|-------|---------|---------|---------|---------|----|
| 1  | 58.0    |         |         |         | G     | 2.189.0 | 1.095.0 | 2.172.0 | 2.171.0 | 19 |
| 2  | 159.1   |         |         | 141.1   | T     | 2.132.0 | 1.066.5 | 2.114.9 | 2.114.0 | 18 |
| 3  | 260.1   |         |         | 242.1   | T     | 2.030.9 | 1.016.0 | 2.013.9 | 2.012.9 | 17 |
| 4  | 373.2   |         |         | 355.2   | L     | 1.929.9 | 965.4   | 1.912.8 | 1.911.9 | 16 |
| 5  | 472.3   |         |         | 454.3   | V     | 1.816.8 | 908.9   | 1.799.8 | 1.798.8 | 15 |
| 6  | 619.3   | 310.2   |         | 601.3   | M+16  | 1.717.7 | 859.4   | 1.700.7 | 1.699.7 | 14 |
| 7  | 718.4   | 359.7   |         | 700.4   | V     | 1.570.7 | 785.8   | 1.553.7 | 1.552.7 | 13 |
| 8  | 832.4   | 416.7   | 815.4   | 814.4   | N     | 1.471.6 | 736.3   | 1.454.6 | 1.453.6 | 12 |
| 9  | 919.5   | 460.2   | 902.4   | 901.4   | S     | 1.357.6 | 679.3   | 1.340.5 | 1.339.6 | 11 |
| 10 | 1.018.5 | 509.8   | 1.001.5 | 1.000.5 | V     | 1.270.5 | 635.8   | 1.253.5 |         | 10 |
| 11 | 1.517.6 | 759.3   | 1.500.6 | 1.499.6 | C+396 | 1.171.5 | 586.2   | 1.154.4 |         | 9  |
| 12 | 1.574.6 | 787.8   | 1.557.6 | 1.556.6 | G     | 672.4   | 336.7   | 655.4   |         | 8  |
| 13 | 1.645.7 | 823.3   | 1.628.6 | 1.627.7 | A     | 615.4   | 308.2   | 598.3   |         | 7  |
| 14 | 1.716.7 | 858.9   | 1.699.7 | 1.698.7 | A     | 544.3   | 272.7   | 527.3   |         | 6  |
| 15 | 1.773.7 | 887.4   | 1.756.7 | 1.755.7 | G     | 473.3   |         | 456.3   |         | 5  |
| 16 | 1.830.8 | 915.9   | 1.813.7 | 1.812.7 | G     | 416.3   |         | 399.2   |         | 4  |
| 17 | 1.943.8 | 972.4   | 1.926.8 | 1.925.8 | I     | 359.2   |         | 342.2   |         | 3  |
| 18 | 2.014.9 | 1.007.9 | 1.997.8 | 1.996.8 | A     | 246.2   |         | 229.1   |         | 2  |
| 19 | 2.189.0 | 1.095.0 | 2.172.0 | 2.171.0 | R     | 175.1   |         | 158.1   |         | 1  |

**BrxA-Cys53-SSB**

| Sequence                                         | Prob | SEQUEST XCorr | SEQUEST ΔCn | NTT | Modifications | Observed | Actual Mass | Charge | ΔAMU     | ΔPPM   | TIC      | Start | Stop | Spectrum ID                                       |  |  |  |
|--------------------------------------------------|------|---------------|-------------|-----|---------------|----------|-------------|--------|----------|--------|----------|-------|------|---------------------------------------------------|--|--|--|
| (K)AEGTTLVVVNSVC <sub>53</sub> (+BSH)GAAAGLAR(P) | 95%  | 2.4157        | 0.5477      | 1   | ^ (+396)      | 785.7110 | 2354.1112   | 3      | 0.002285 | 0.9702 | 7,578.04 | 41    | 61   | 110327_OV3_P3_KG_HA_YphPC55A_10.11736.11736.3.dta |  |  |  |

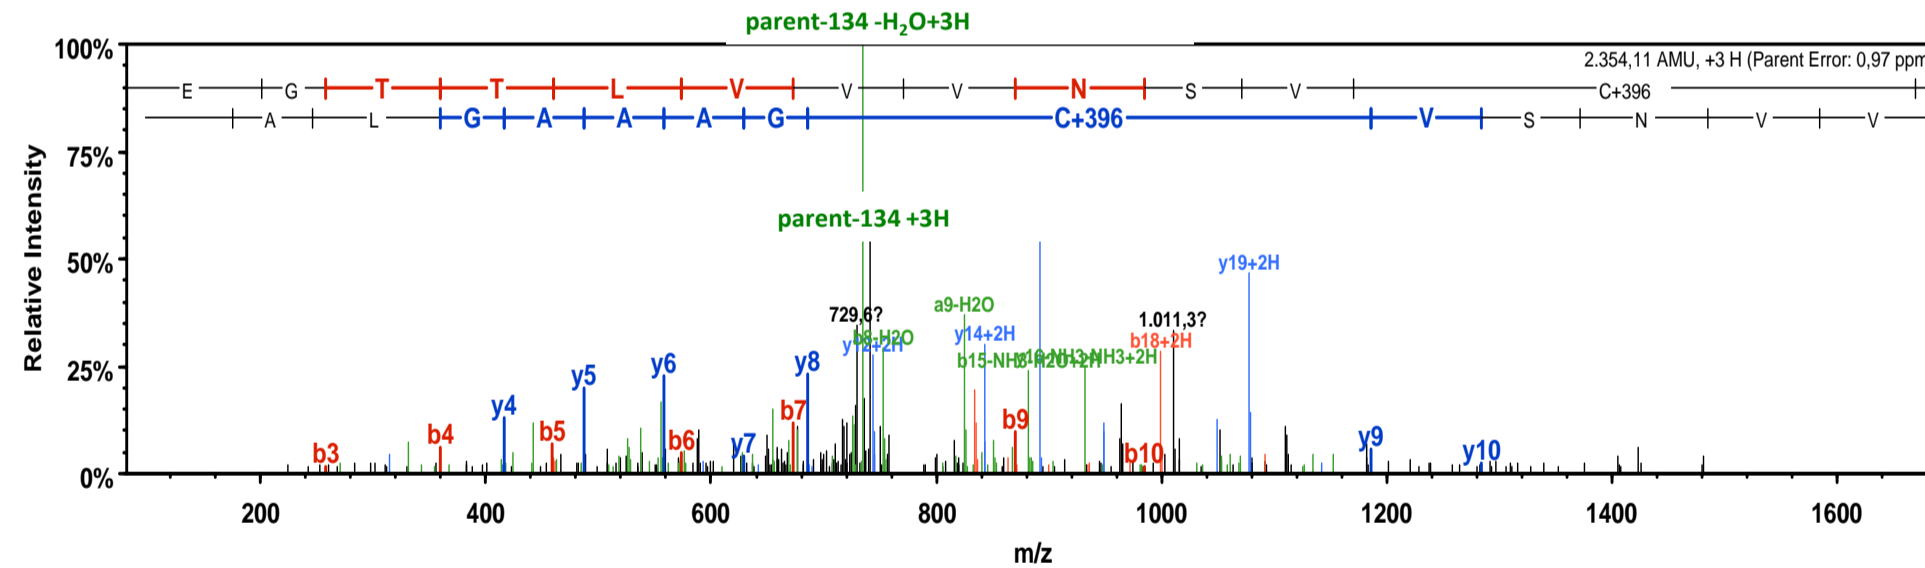

| B  | B Ions  | B+2H    | B-NH3   | B-H2O   | AA    | Y Ions  | Y+2H    | Y-NH3   | Y-H2O   | Y  |
|----|---------|---------|---------|---------|-------|---------|---------|---------|---------|----|
| 1  | 72.0    |         |         |         | A     | 2.355.1 | 1.178.1 | 2.338.1 | 2.337.1 | 21 |
| 2  | 201.1   |         |         | 183.1   | E     | 2.284.1 | 1.142.5 | 2.267.1 | 2.266.1 | 20 |
| 3  | 258.1   |         |         | 240.1   | G     | 2.155.0 | 1.078.0 | 2.138.0 | 2.137.0 | 19 |
| 4  | 359.2   |         |         | 341.1   | T     | 2.098.0 | 1.049.5 | 2.081.0 | 2.080.0 | 18 |
| 5  | 460.2   |         |         | 442.2   | T     | 1.997.0 | 999.0   | 1.979.9 | 1.979.0 | 17 |
| 6  | 573.3   | 297.1   |         | 555.3   | L     | 1.895.9 | 948.5   | 1.878.9 | 1.877.9 | 16 |
| 7  | 672.4   | 336.7   |         | 654.3   | V     | 1.782.8 | 891.9   | 1.765.8 | 1.764.8 | 15 |
| 8  | 771.4   | 386.2   |         | 753.4   | V     | 1.683.8 | 842.4   | 1.666.7 | 1.665.8 | 14 |
| 9  | 870.5   | 435.8   |         | 852.5   | V     | 1.584.7 | 792.9   | 1.567.7 | 1.566.7 | 13 |
| 10 | 984.5   | 492.8   | 967.5   | 966.5   | N     | 1.485.6 | 743.3   | 1.468.6 | 1.467.6 | 12 |
| 11 | 1.071.6 | 536.3   | 1.054.5 | 1.053.6 | S     | 1.371.6 | 686.3   | 1.354.6 | 1.353.6 | 11 |
| 12 | 1.170.6 | 585.8   | 1.153.6 | 1.152.6 | V     | 1.284.6 | 642.8   | 1.267.5 |         | 10 |
| 13 | 1.669.7 | 835.4   | 1.652.7 | 1.651.7 | C+396 | 1.185.5 | 593.2   | 1.168.5 |         | 9  |
| 14 | 1.726.8 | 863.9   | 1.709.7 | 1.708.7 | G     | 686.4   | 343.7   | 669.4   |         | 8  |
| 15 | 1.797.8 | 899.4   | 1.780.8 | 1.779.8 | A     | 629.4   | 315.2   | 612.3   |         | 7  |
| 16 | 1.868.8 | 934.9   | 1.851.8 | 1.850.8 | A     | 558.3   | 279.7   | 541.3   |         | 6  |
| 17 | 1.939.9 | 970.4   | 1.922.8 | 1.921.9 | A     | 487.3   |         | 470.3   |         | 5  |
| 18 | 1.996.9 | 998.9   | 1.979.9 | 1.978.9 | G     | 416.3   |         | 399.2   |         | 4  |
| 19 | 2.110.0 | 1.055.5 | 2.092.9 | 2.092.0 | L     | 359.2   |         | 342.2   |         | 3  |
| 20 | 2.181.0 | 1.091.0 | 2.164.0 | 2.163.0 | A     | 246.2   |         | 229.1   |         | 2  |
| 21 | 2.355.1 | 1.178.1 | 2.338.1 | 2.337.1 | R     | 175.1   |         | 158.1   |         | 1  |

**Legend to Table S4: BrxB C54A with the Cys52-SSB site (upper figure) and BrxA C55A with Cys53-SSB site (bottom figure) in vivo.** FLAG-tagged BrxB C54A and BrxA C55A proteins were purified from *B. subtilis* cells after NaOCl-stress, separated by SDS-PAGE and the Brx bands tryptically digested. The resulting peptides were analyzed using LTQ Orbitrap Velos LC-MS/MS analysis as described in the Methods section (Chi et al., 2011). The Scaffold search results are shown and the Table includes the Xcorr, deltaCn scores, m/z of the precursor ions, neutral molecular masses of the peptides, peptide mass deviations (delta ppm) of the S-bacillithiolated Cys52 peptide in BrxB C54A and Cys53 in BrxA C55A. The CID MS/MS spectra are shown with the b and y ion series labeled in red and blue, respectively.
